# Supplementary material for: The role of microorganisms in the formation of a stalactite in Botovskaya Cave, Siberia – paleoenvironmental implications
Source: Copernicus journal article supplement (doi:10.5194/bg-10-6115-2013), 2013-09-27
Supplement: Supplementary file 2 [file bg-10-6115-2013-supplement.zip]

## Stalagmite BOTI-881

| Sample ID | Distance<br>from<br>stalagmite<br>top (mm) | d13C (VPDB) | d18O (VPDB) |
|-----------|--------------------------------------------|-------------|-------------|
| 109       | 0.9                                        | -0.59       | -13.04      |
| 108       | 2.1                                        | -0.41       | -13.21      |
| 107       | 3.5                                        | -1.09       | -13.17      |
| 106       | 4.6                                        | -1.45       | -13.32      |
| 105       | 5.7                                        | -1.63       | -13.44      |
| 104       | 6.8                                        | -1.50       | -13.77      |
| 103       | 7.8                                        | -1.28       | -13.70      |
| 102       | 8.9                                        | -1.06       | -13.62      |
| 101       | 9.9                                        | -0.95       | -13.49      |
| 100       | 11.1                                       | -1.03       | -13.45      |
| 99        | 11.9                                       | -1.10       | -13.54      |
| 98        | 12.0                                       | -1.36       | -13.55      |
| 97        | 13.1                                       | -1.28       | -13.61      |
| 96        | 14.2                                       | -1.26       | -13.43      |
| 95        | 15.4                                       | -1.27       | -13.50      |
| 94        | 16.5                                       | -1.17       | -13.55      |
| 93        | 17.4                                       | -1.12       | -13.70      |
| 92        | 18.8                                       | -1.01       | -13.80      |
| 91        | 20.2                                       | -0.95       | -13.55      |
| 90        | 21.5                                       | -0.91       | -13.54      |
| 89        | 22.6                                       | -0.88       | -13.54      |
| 88        | 23.8                                       | -1.03       | -13.50      |
| 87        | 25.4                                       | -0.98       | -13.62      |
| 86        | 26.8                                       | -1.00       | -13.47      |
| 85        | 27.9                                       | -0.96       | -13.46      |
| 84        | 29.3                                       | -1.04       | -13.67      |
| 83        | 30.5                                       | -1.00       | -13.50      |
| 82        | 31.7                                       | -0.90       | -13.52      |
| 81        | 32.9                                       | -0.84       | -13.47      |
| 80        | 34.5                                       | -1.06       | -13.42      |
| 79        | 35.4                                       | -0.95       | -13.35      |
| 78        | 36.3                                       | -0.85       | -13.23      |
| 77        | 37.4                                       | -0.69       | -13.08      |
| 76        | 38.3                                       | -0.82       | -13.16      |
| 75        | 39.5                                       | -0.82       | -13.13      |
| 74        | 40.8                                       | -0.74       | -13.06      |
| 73        | 42.2                                       | -0.83       | -13.05      |
| 72        | 43.1                                       | -0.72       | -12.98      |

|    |       |       |        |
|----|-------|-------|--------|
| 71 | 44.2  | -0.75 | -12.94 |
| 70 | 45.2  | -0.70 | -12.84 |
| 69 | 46.5  | -0.63 | -12.78 |
| 68 | 48.0  | -0.63 | -12.74 |
| 67 | 49.4  | -0.59 | -12.75 |
| 66 | 50.5  | -0.65 | -12.77 |
| 65 | 51.7  | -0.68 | -12.82 |
| 64 | 52.8  | -0.80 | -12.73 |
| 63 | 53.9  | -0.64 | -12.62 |
| 62 | 55.5  | -0.64 | -12.59 |
| 61 | 57.0  | -0.74 | -12.47 |
| 60 | 58.3  | -0.59 | -12.31 |
| 59 | 59.4  | -0.57 | -12.25 |
| 58 | 60.7  | -0.69 | -12.22 |
| 57 | 62.3  | -0.61 | -12.07 |
| 56 | 63.4  | -0.60 | -12.06 |
| 55 | 64.0  | -0.59 | -11.91 |
| 54 | 65.1  | -0.58 | -11.60 |
| 53 | 66.5  | -0.62 | -11.70 |
| 52 | 68.2  | -0.59 | -11.72 |
| 51 | 69.2  | -0.13 | -11.59 |
| 50 | 70.7  | 0.03  | -11.43 |
| 49 | 72.1  | -0.03 | -11.34 |
| 48 | 73.5  | 0.03  | -11.52 |
| 47 | 74.6  | 0.25  | -11.54 |
| 46 | 76.0  | 0.10  | -11.53 |
| 45 | 77.7  | -0.12 | -11.60 |
| 44 | 78.8  | -0.01 | -11.48 |
| 43 | 80.0  | -0.49 | -11.44 |
| 42 | 82.1  | 0.01  | -11.47 |
| 41 | 83.1  | 0.03  | -11.32 |
| 40 | 84.5  | 0.08  | -11.38 |
| 39 | 85.6  | 0.00  | -11.23 |
| 38 | 87.3  | 0.12  | -11.31 |
| 37 | 89.2  | -0.07 | -11.19 |
| 36 | 90.6  | 0.13  | -11.78 |
| 35 | 92.1  | 0.05  | -11.38 |
| 34 | 93.5  | 0.29  | -11.79 |
| 33 | 95.2  | 0.90  | -11.99 |
| 32 | 96.6  | 0.98  | -11.97 |
| 31 | 98.2  | 1.52  | -12.07 |
| 30 | 99.4  | 1.03  | -12.19 |
| 29 | 100.5 | 1.16  | -12.10 |

|    |       |       |        |
|----|-------|-------|--------|
| 28 | 101.7 | 1.16  | -12.29 |
| 27 | 103.0 | 1.14  | -12.46 |
| 26 | 104.5 | 1.11  | -12.70 |
| 25 | 105.8 | 1.31  | -12.69 |
| 24 | 106.8 | 0.63  | -12.96 |
| 23 | 108.0 | -0.26 | -13.25 |
| 22 | 109.2 | -0.31 | -12.95 |
| 21 | 110.4 | -0.75 | -13.18 |
| 20 | 111.6 | -1.18 | -13.42 |
| 19 | 112.8 | -1.39 | -13.32 |
| 18 | 114.9 | -0.78 | -12.92 |
| 17 | 116.3 | -0.94 | -12.81 |
| 16 | 117.8 | -0.73 | -12.60 |
| 15 | 118.9 | 0.61  | -12.67 |
| 14 | 119.9 | 0.77  | -12.92 |
| 13 | 121.2 | 1.11  | -13.27 |
| 12 | 122.9 | 1.28  | -13.02 |
| 11 | 124.1 | 1.01  | -13.26 |
| 10 | 125.6 | 1.83  | -12.85 |
| 9  | 127.5 | 0.15  | -14.11 |
| 8  | 129.4 | -0.60 | -13.73 |
| 7  | 131.6 | -0.38 | -13.60 |
| 6  | 133.3 | -1.43 | -14.02 |
| 5  | 135.4 | -1.12 | -13.83 |
| 4  | 136.7 | -0.88 | -14.02 |
| 3  | 138.7 | -0.80 | -13.82 |
| 2  | 140.3 | -1.33 | -13.55 |
| 1  | 143.0 | -0.22 | -13.14 |

Stalagmite BOTI-4537

| <b>Sample ID</b> | <b>Distance from<br/>stalagmite<br/>top (mm)</b> | <b>d13C (VPDB)</b> | <b>d18O (VPDB)</b> |
|------------------|--------------------------------------------------|--------------------|--------------------|
| 035              | 2.0                                              | -2.81              | -14.49             |
| 034              | 5.6                                              | -2.60              | -14.58             |
| 033              | 10.7                                             | -2.70              | -14.77             |
| 016a             | 14.1                                             | -2.48              | -14.73             |
| 032              | 16.7                                             | -2.54              | -14.67             |
| 031              | 20.3                                             | -2.49              | -15.02             |
| 015a             | 23.7                                             | -2.49              | -14.78             |
| 030              | 24.5                                             | -2.50              | -14.96             |
| 029              | 27.3                                             | -2.27              | -14.98             |
| 028              | 29.0                                             | -2.42              | -14.88             |
| 027              | 32.0                                             | -2.25              | -15.38             |
| 026              | 35.3                                             | -2.26              | -15.38             |
| 014a             | 37.9                                             | -2.05              | -14.86             |
| 024              | 40.3                                             | -2.04              | -14.47             |
| 013a             | 42.6                                             | -2.03              | -14.68             |
| 022              | 45.2                                             | -1.94              | -14.24             |
| 019              | 49.2                                             | 0.82               | -13.38             |
| 012a             | 53.0                                             | 0.81               | -13.90             |
| 016              | 55.5                                             | 1.84               | -13.31             |
