# Supplementary figures and images for: The role of microorganisms in the formation of a stalactite in Botovskaya Cave, Siberia – paleoenvironmental implications
Source: Copernicus journal article supplement (doi:10.5194/bg-10-6115-2013), 2013-09-27

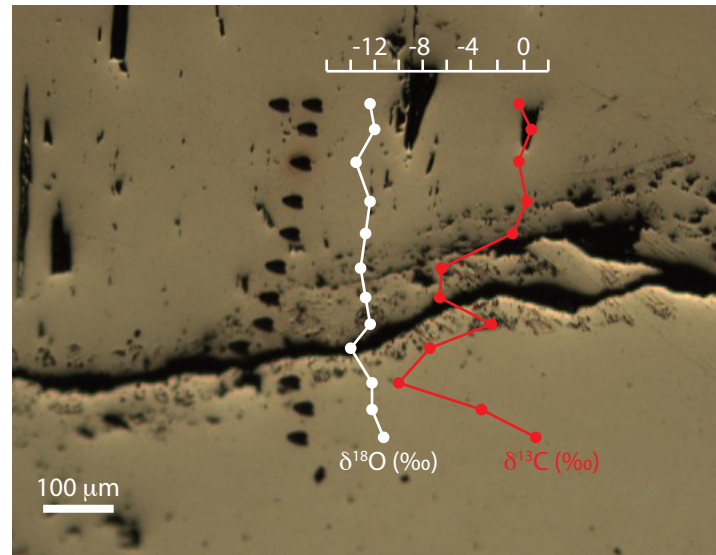

Supplement: Supplementary file 1 [file bg-10-6115-2013-supplement.zip]

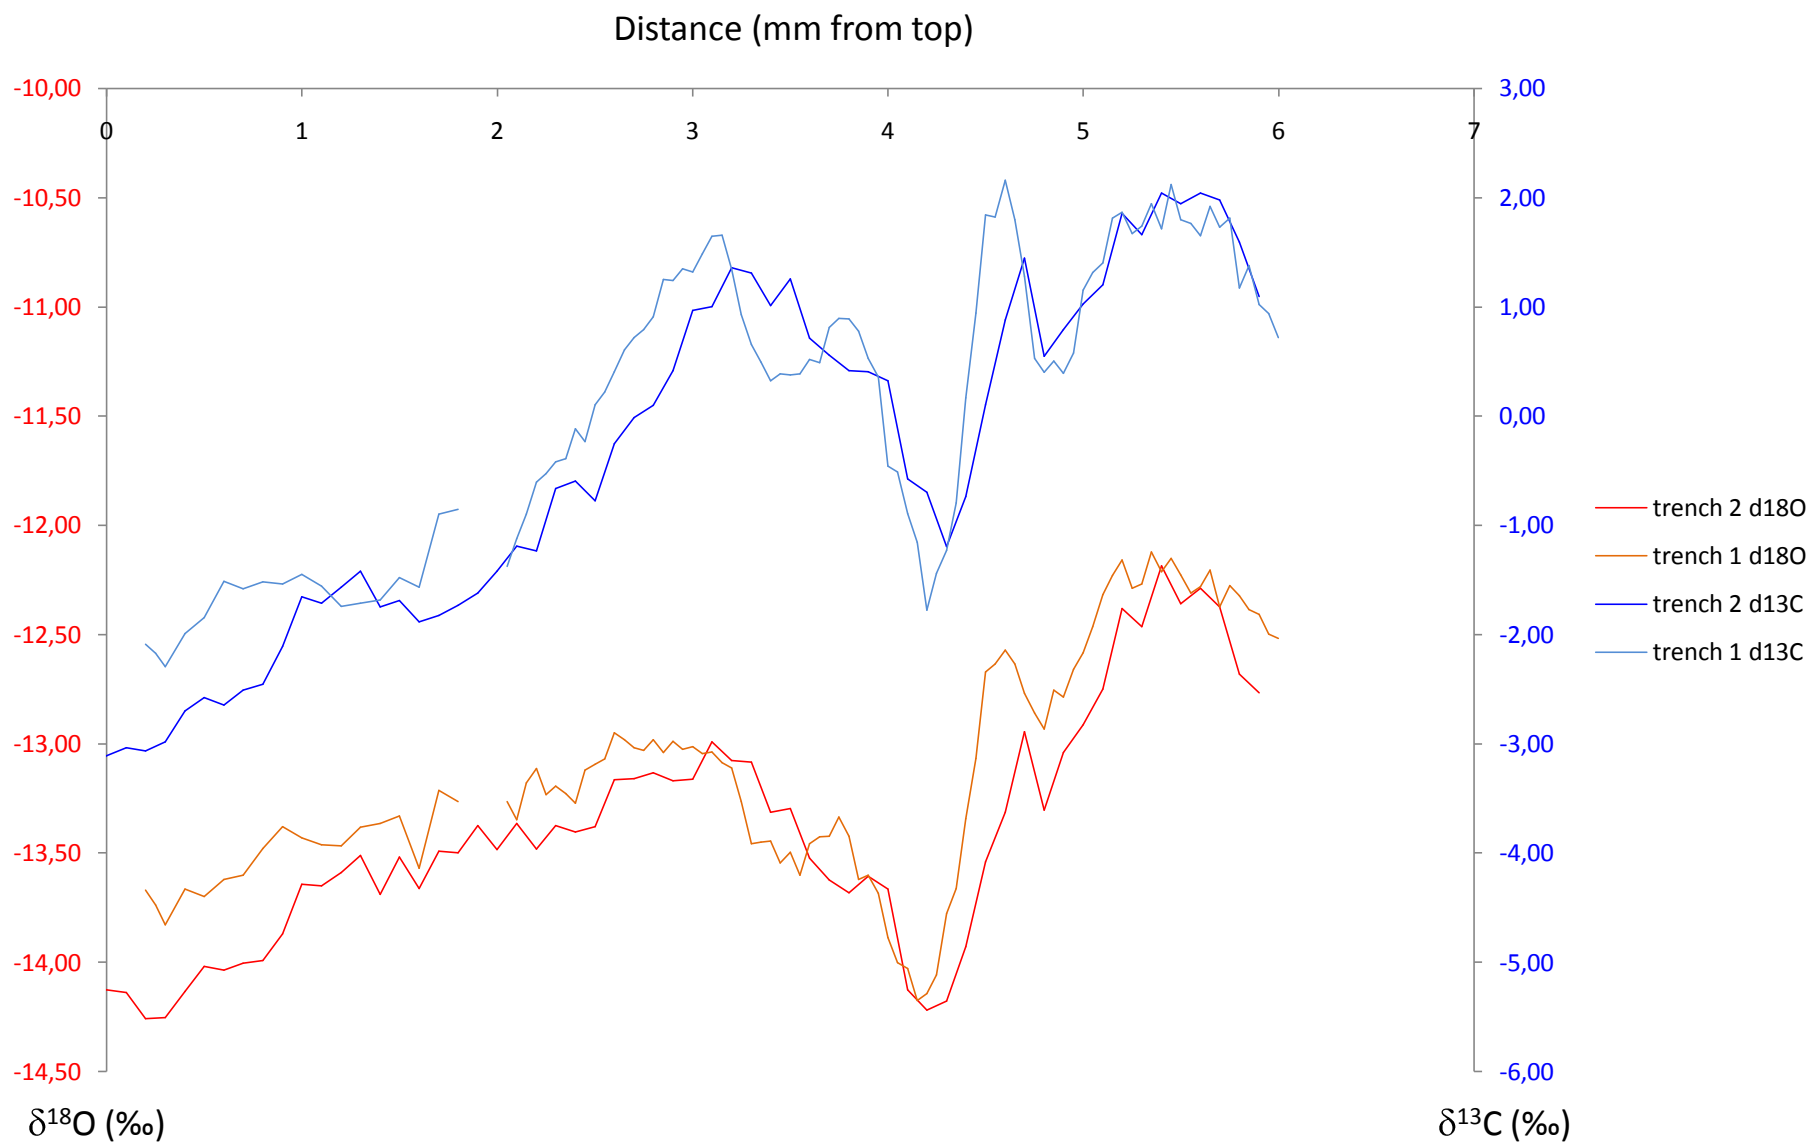

Supplementary Figure 3

Supplement: Supplementary file 3 [file bg-10-6115-2013-supplement.zip]

# П. Ботовская

топосъемка Иркутского  
клуба спелеологов "Арабика"  
1994 - 2005 гг.

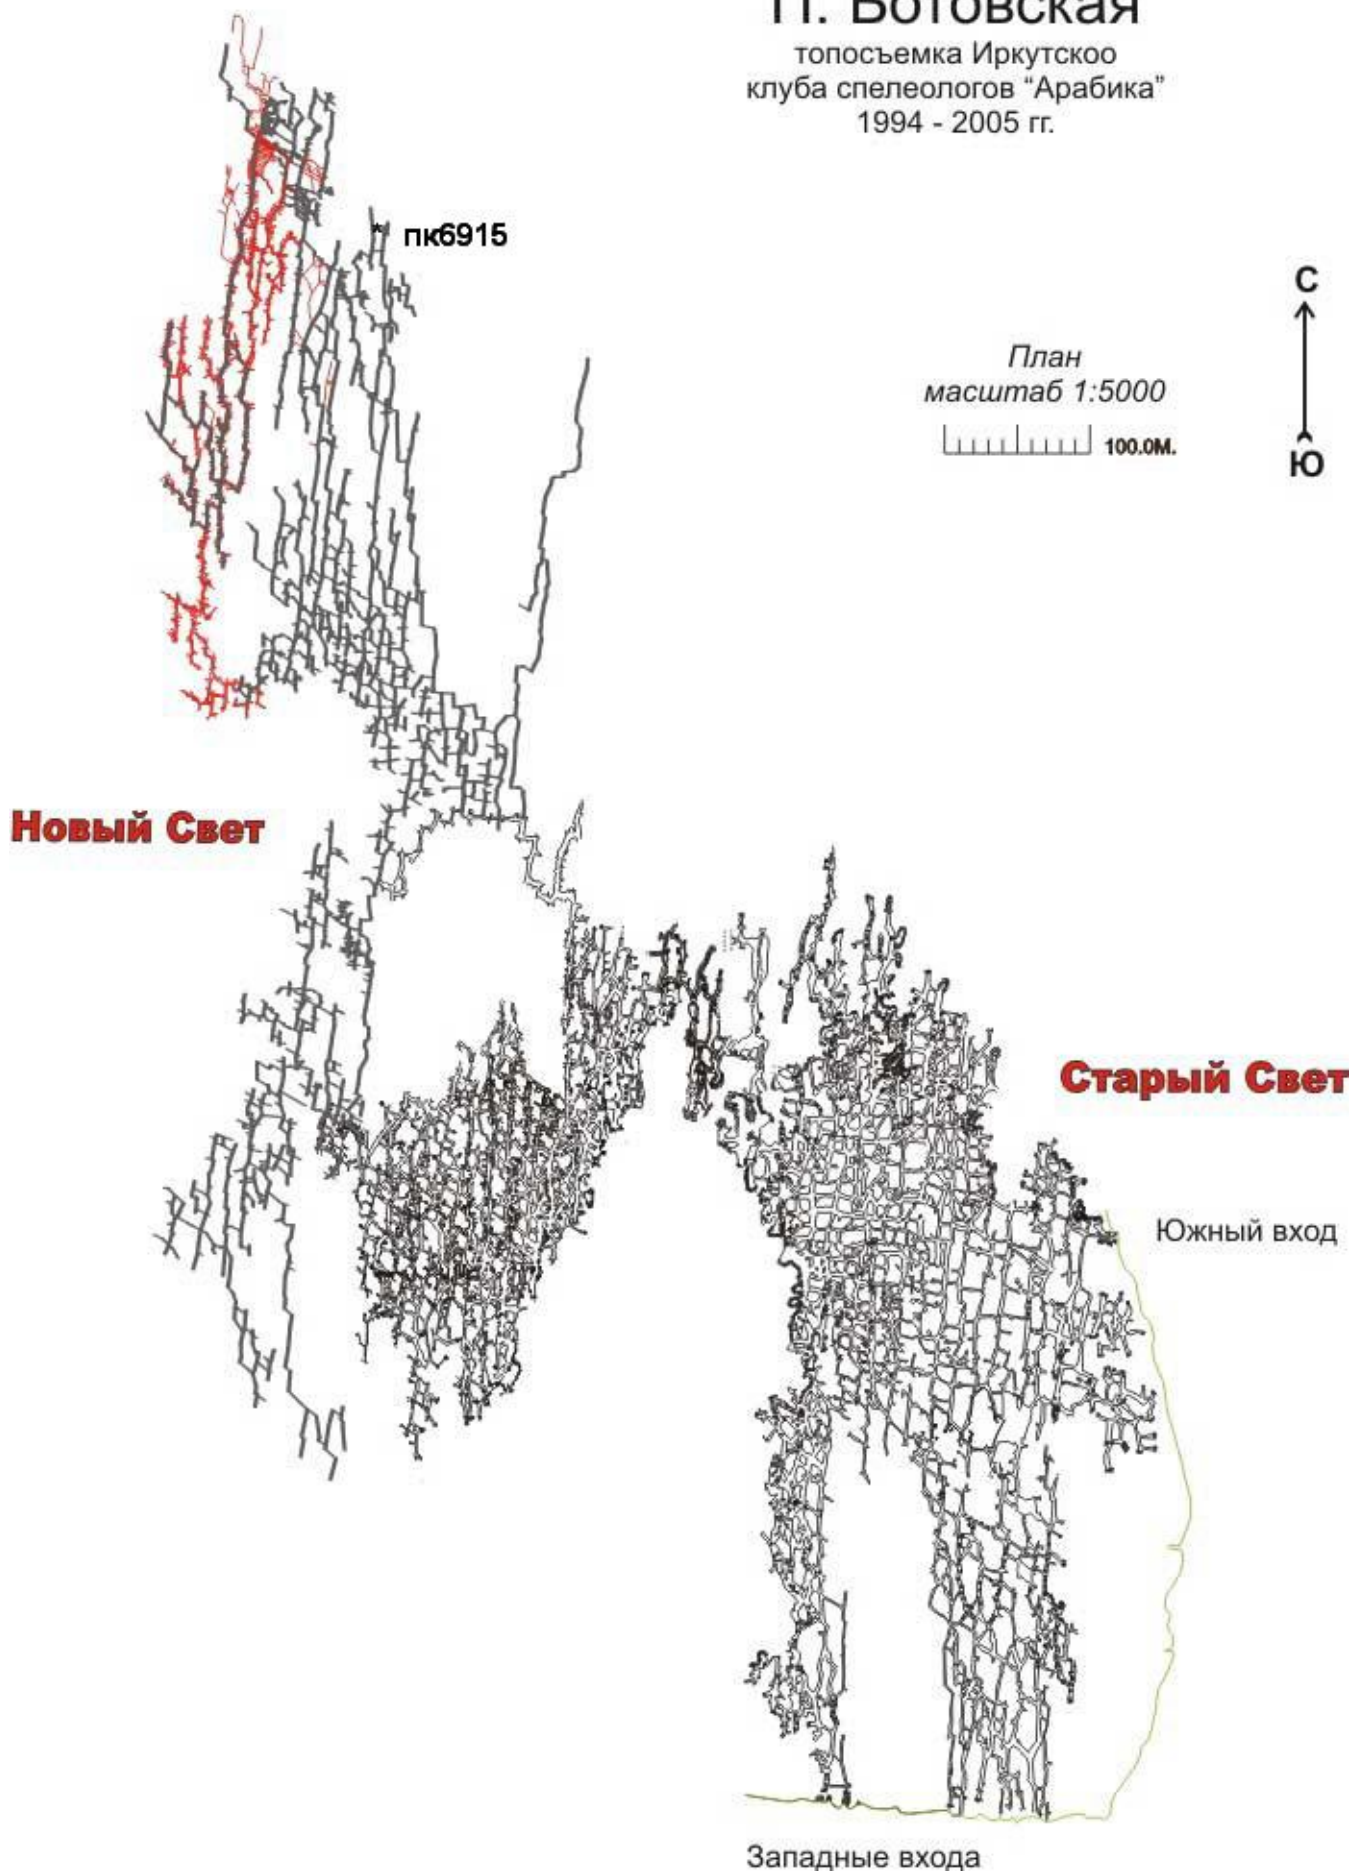

Supplement: Supplementary file 4 [file bg-10-6115-2013-supplement.zip]
